# Supplementary material for: TRP Channels Expression Profile in Human End-Stage Heart Failure
Source: MDPI journal article supplement (doi:10.3390/medicina55070380), 2019-07-16
Supplement: s1 [file s1]

| Abbreviation | Definition                                |
|--------------|-------------------------------------------|
| BMI          | Body mass index                           |
| SBP          | Systolic Blood Pressure                   |
| DBP          | Diastolic Blood Pressure                  |
| HR           | Heart Rate                                |
| NT-proBNP    | N-terminal pro B-type natriuretic peptide |
| TAG          | Triacylglycerides                         |
| HW           | Heart Weight                              |
| LVEF         | Left Ventricle Ejection Fraction          |
| LVEDD        | Left Ventricle End-diastolic Diameter     |
| RVEDD        | Right Ventricle End-diastolic Diameter    |
